1 **Novel leaf-root coordination driven by leaf water storage tissues in mangroves**

2

3 Jingjing Cao<sup>1</sup>, Qingpei Yang<sup>1</sup>, Jing Chen<sup>1</sup>, Mingzhen Lu<sup>2</sup>, Weizheng Ren<sup>1</sup>, Yanmei

4 Xiong<sup>3</sup>, Yuxin Pei<sup>1</sup>, Deliang Kong<sup>1\*</sup>

5

6 <sup>1</sup> College of forestry, Henan Agricultural University, Zhengzhou 450002, China

7 <sup>2</sup> Santa Fe Institute, Santa Fe, NM 87501, USA

8 <sup>3</sup> Research Institute of Tropical Forestry, Chinese Academy of Forestry, Guangzhou

9 510520, China

10

11 **Key words:** leaf hydraulic traits, leaf economics traits, root hydraulic traits, leaf

12 *water storage tissues*, allometry, mangrove and non-mangrove plants

13

14 **Correspondence and requests for materials should be addressed to D.K.** (email:

15 deliangkong1999@126.com)

16 **Abstract**

17 **Interactions among root and leaf traits (in particular, leaf hydraulic and leaf economics**  
18 **traits) are fundamental in generating diverse strategies in land plants, yet it remains a**  
19 **knowledge gap in mangrove plants that experiences saline stress distinct from most**  
20 **other vascular plants. Here, we tested the trait relationships in mangrove plants and**  
21 **compared them with typical land plants (non-mangrove). Consistent with non-mangrove**  
22 **plants, leaf hydraulic and economics traits were decoupled in mangrove plants. However,**  
23 **mangrove leaf economics traits correlated strongly with root hydraulic traits, which are**  
24 **normally decoupled in non-mangrove plants. Moreover, we observed a unique scaling**  
25 **relationship between *leaf dry mass per area* and root hydraulic traits in mangroves. The**  
26 **novel coordination between leaves and roots arises from the wide-presence of leaf *water***  
27 ***storage tissues* in mangroves, and this potentially represents a new paradigm with which**  
28 **we look into the ecology, physiology and evolution of this important vegetation.**

29

30 **Introduction**

31 Photosynthesis, the conversion of atmospheric CO<sub>2</sub> into carbohydrates by the leaves using  
32 light, is the most important biological process on Earth. During this process, atmospheric CO<sub>2</sub>  
33 enters the leaf mesophyll, mainly the palisade cells, and is fixed as carbohydrates through a  
34 series of biochemical reactions<sup>1</sup>. Researchers coined a term, “leaf economics spectrum”, to  
35 describe a tradeoff in this process across species worldwide; that is, leaves with higher leaf  
36 CO<sub>2</sub> fixation rates have a shorter leaf lifespan, and vice versa<sup>2,3,4,5</sup>.

37 The maintenance of photosynthesis relies greatly on water supply by leaf veins, and a large

38 portion of water is lost by transpiration through stomata. The well-correlated vein and  
39 stomatal traits depicting water supply into and loss out of leaves constitute leaf hydraulic  
40 traits, or the leaf hydraulics. While leaf hydraulics is vital to the process of leaf photosynthesis  
41 (which lead us to hypothesize a coupling of leaf hydraulics and economics), recent findings  
42 however suggest that leaf hydraulics is decoupled from leaf economics across a range of  
43 non-mangrove plants<sup>6,7</sup>. This counterintuitive finding thus further suggests that leaves should  
44 be understood by looking at multiple trait dimensions (often referred to as  
45 “multidimensionality”). The multidimensionality in leaves uncovers a ubiquitous mechanism  
46 by which species coexist and respond to global climate change<sup>7</sup>.

47 The decoupling between leaf hydraulics and economics can essentially arise from how the  
48 water is partitioned between leaf photosynthesis and transpiration, although previously studies  
49 ascribed such decoupling to functional modularity of leaf anatomic structures (i.e., mesophyll  
50 and veins), non-simultaneous evolution of leaf mesophyll and leaf veins, and selection by  
51 environmental heterogeneity<sup>7</sup>. Specifically, plants generally lose hundreds, even thousands, of  
52 mol of water through transpiration in exchange for the fixation of 1 mol of atmospheric CO<sub>2</sub><sup>1</sup>.  
53 Theoretically, 1 mol water is consumed in the biochemical fixation of 1 mol CO<sub>2</sub>, and we refer  
54 to such water as “*water used for photosynthetic metabolism (WUPM)*.” Undoubtedly, *WUPM*  
55 is closely related to leaf economics, whereas “*water used for transpiration* (termed as *WUT*) ”  
56 is tightly associated with leaf hydraulic traits<sup>7,8</sup>. Given that *WUPM* is negligible compared to  
57 *WUT*, it is likely that *WUPM* and hence leaf economics could have little impact on leaf  
58 hydraulics. Therefore, the contrasting amount and functioning of *WUPM* and *WUT* constitute  
59 a novel mechanism that essentially drives leaf economics-hydraulics decoupling<sup>5,7,9</sup>.

60        However, our current knowledge on the relationship between leaf hydraulics and  
61        economics comes mainly from land plants. It remains unclear whether the decoupling  
62        between leaf hydraulics and economics still holds and whether the above novel mechanism  
63        accounting for such decoupling can be applied to plants under stressful environments such as  
64        coastal mangrove species that typically grow under high salinity and are confronted with  
65        severe physiological drought<sup>5,10,11</sup>. One conspicuous characteristic of mangrove plants is that  
66        they usually have significant *water storage tissues* in their leaves as an adaption to the  
67        imperative water demanding of transpiration under drought stress<sup>12,13,14,15,16</sup>. Meanwhile,  
68        plants usually adjust above- and belowground organs (e.g., leaves vs. roots) in a coordinated  
69        manner during plant evolution and response to changing environments<sup>4,17,18,19,20,21</sup>. However,  
70        little is known about how leaves, especially leaf *water storage tissues*, and roots vary across  
71        mangrove species and how above- and belowground coordination, if present, differs from that  
72        of non-mangrove plants.

73        The absorption and transport of water under strong osmotic stress due to high soil salinity  
74        are crucial for growth and survival of mangrove plants<sup>22,23,24,25</sup>. Root anatomical structures,  
75        such as the stele and cortex, are directly related to root water absorption and  
76        transportation<sup>26,27,28</sup>, and the anatomical traits, hereafter termed root hydraulic traits or root  
77        hydraulics. For root hydraulics in non-mangrove plants, the *thickness of root tissues outside*  
78        *the stele* (including epidermis, exodermis and cortex) has been widely observed to increase  
79        considerably faster than the stele radius with increasing root diameter<sup>26,29,30</sup>. This allometry in  
80        root structures is insightful for understanding plant evolution and responses to drought and  
81        carbon (C) limitation under stress<sup>31,32,33</sup> that mangrove species are exposed to in their natural

82 habitats. However, it is still unclear whether allometry between *root tissues outside the stele*  
83 and stele exists in mangrove species and how such allometry, if present, cooperates with  
84 leaves in adaptation to salinity stress.

85 In the present study, we selected 17 representative mangrove species in a reserve in  
86 southern China in which the most diverse mangrove species in China are found. We measured  
87 10 leaf hydraulic and economics traits, including leaf *water storage tissues*, and 4 root  
88 hydraulic traits. To compare trait relationships between mangrove and non-mangrove plants,  
89 we constructed a dataset of land species with leaf and root traits measured concomitantly<sup>7,26</sup>.  
90 We tested the following hypotheses: (1) compared with the independence between leaf  
91 hydraulics and economics in non-mangrove plants, the two trait spectrum should be coupled  
92 in mangrove plants under high-salinity selection pressure; (2) in mangrove plants, root  
93 hydraulics should be positively correlated with both leaf hydraulics and economics, which  
94 would be different from non-mangrove plants where root hydraulics is positively correlated  
95 with leaf hydraulics<sup>18,28</sup>, yet decoupled from leaf economics.

96

## 97 **Results**

98 **Traits association between leaf economics and leaf hydraulics.** The first principal  
99 component analysis (PCA) axis explained 52.53% of total leaf trait variation in leaves of  
100 mangrove species. Leaf economics traits, such as *leaf dry mass per area*, *specific leaf area*,  
101 *leaf mass-based nitrogen concentration*, *leaf thickness*, *leaf water storage tissues*, and *total*  
102 *phenol content*, had relatively high loading scores on this axis (Fig. 1a, Table S1). *Leaf*  
103 *mass-based nitrogen concentration* was negatively correlated with *leaf dry mass per area* ( $r =$

104 -0.86,  $p < 0.001$ ) and leaf *water storage tissues* was positively correlated with *leaf dry mass*  
105 *per area* and *leaf thickness* ( $r = 0.71$ ,  $p = 0.001$ ;  $r = 0.62$ ,  $p = 0.008$ ) (Table S2). The second  
106 PCA axis accounted for 21.28% of the total leaf trait variation. *Leaf minor vein density*, *leaf*  
107 *minor vein diameter*, *leaf tissue density*, and *leaf C isotope composition* (mainly hydraulic  
108 traits) had high loading on this axis (Fig. 1a, Table S1). *Leaf minor vein diameter* was  
109 negatively correlated with *leaf minor vein density* ( $r = -0.90$ ,  $p < 0.001$ ); neither vein trait was  
110 correlated with *leaf tissue density*, or *leaf C isotope composition* (Table S2). In addition,  
111 permutation analysis of mangrove plants showed a significant coupling of leaf *water storage*  
112 *tissues* with leaf economics ( $p = 0.003$ ) instead of leaf hydraulics ( $p = 0.338$ ) (Fig. S1).

113 Regarding non-mangrove species, the first PCA axis of leaves explained 37.83% of total  
114 leaf trait variation. *Leaf thickness*, *leaf minor vein density*, *stomatal guard cell length*,  
115 *stomatal density*, and *maximum stomatal conductance to water vapor* had relatively high  
116 loading scores on this axis (Fig. 1b, Table S3). Among leaf hydraulic traits, *leaf minor vein*  
117 *density* was negatively correlated with *stomatal guard cell length* ( $r = -0.48$ ,  $p < 0.001$ ) and  
118 positively correlated with *stomatal density* ( $r = 0.36$ ,  $p = 0.001$ ) (Table S4). The second PCA  
119 axis accounted for 24.93% of the total leaf trait variation. *Leaf dry mass per area*, and *leaf*  
120 *mass-based nitrogen concentration*, *leaf C isotope composition*, *stomatal density*, and  
121 *maximum stomatal conductance to water vapor* had high loading scores on this axis (Fig. 1b,  
122 Table S3). Among leaf economics traits, *leaf dry mass per area* was negatively correlated with  
123 *leaf mass-based nitrogen concentration* ( $r = -0.49$ ,  $p < 0.001$ ) (Table S4).

124

125 **Leaf-root traits coordination.** When leaf and root traits were pooled in mangrove plants, the

126 first two axes of the leaf-root combined PCA accounted for 50.73% and 15.87% of the total  
127 trait variation, respectively (Fig. 2a). Root and leaf traits with high loading scores separately  
128 in the first axis of the root and the leaf PCA also had high loading scores in the first axis of  
129 the leaf-root combined PCA. *Leaf minor vein density* and *minor vein diameter* had high  
130 loading scores in the second axis of the combined PCA (Fig. 2a, Table S5).

131 In non-mangrove species, the first two axes of the leaf-root combined PCA accounted for  
132 36.25% and 18.72% of the total trait variation, respectively. *Leaf minor vein density*, *root*  
133 *diameter*, *thickness of root tissues outside the stele*, and *stele to root diameter ratio* had high  
134 loading scores in the first axis of the combined PCA. *Stomatal density*, *maximum stomatal*  
135 *conductance to water vapor*, *thickness of root tissues outside the stele*, and *root stele diameter*  
136 had high loading scores in the second axis of the combined PCA (Fig. 2b, Table S6).

137 Permutation analysis of the first PCA scores of the three trait groups (i.e., leaf hydraulic  
138 traits, leaf economics traits, and root hydraulic traits, Fig. 2a) showed independence of leaf  
139 hydraulics from both leaf economics and root hydraulics ( $p = 0.117$ ,  $p = 0.218$ , respectively)  
140 In contrast leaf economics was coupled with root hydraulics in mangrove species ( $p < 0.001$ )  
141 (Fig. 2a, Fig. S2, Table S5). In the 78 non-mangrove plant species, leaf hydraulics, although  
142 decoupled from leaf economics ( $p = 0.062$ ), correlated with root hydraulics ( $p = 0.012$ ), and  
143 the leaf economics of these species were orthogonal to root hydraulics ( $p = 0.073$ ) (Fig. 2b,  
144 Fig. S3, Table S6). Overall, the effect of phylogeny on leaf and root traits was relatively less  
145 pronounced in mangrove plants than in non-mangrove plants (Tables 1 and 2), suggesting the  
146 importance of environmental selection in shaping mangrove plant traits. Phylogenetically  
147 independent contrast-based relationships among leaf hydraulics, economics, and root

148 hydraulics were generally similar to the results obtained from mangrove plants' original trait  
149 data (Fig. S4, S5).

150

151 **Leaf-root allometry.** The root stele radius and *thickness of root tissues outside the stele*  
152 followed an allometric relationship with increasing *root diameter* in both mangrove and  
153 non-mangrove species (Fig. S6). As the keystone trait of leaves, *leaf dry mass per area* (LMA)  
154 is perhaps the single most important organizing trait among all other leaf traits. Surprisingly,  
155 we found a strong allometric relationship between LMA and root anatomical traits only in  
156 mangrove plants ( $p < 0.001$ , each; Fig. 3a). Specifically, the regression slope (in absolute  
157 values) of the relationship between *thickness of root tissues outside the stele* and LMA was  
158 higher than the regression slope of the relationship between stele radius and LMA  
159 (standardized major axis,  $p < 0.001$ ). Leaf-root allometry was still detected when other leaf  
160 economics traits, such as *leaf thickness*, *specific leaf area*, *leaf water storage tissues*, and *leaf*  
161 *mass-based nitrogen concentration* were used (Fig. S7a–d). Unlike mangrove plants, neither  
162 of the above two root anatomical traits were correlated with LMA in non-mangrove species  
163 (Fig. 3b).

164

## 165 **Discussion**

166 **Decoupling of leaf economics from leaf hydraulics shared among mangrove and**  
167 **non-mangrove plants.** Contrary to our first hypothesis postulating coupled leaf economics  
168 with leaf hydraulics in mangrove plants, the two trait spectra were decoupled in mangrove  
169 leaves (Fig. 1a, Fig. S2a) as has been commonly observed in non-mangrove plants. Unlike



170 most non-mangrove plants, mangrove plants usually have remarkable *water storage tissues* in  
171 their leaves to adapt to physiological drought caused by high-salinity environments<sup>34</sup>. For  
172 example, it has been reported that the mangrove plant *Avicennia marina* can maintain a  
173 normal transpiration rate for up to 2 h under water supply from leaf *water storage tissues*  
174 without water supply from roots<sup>35,36</sup>. Therefore, leaf *water storage tissues* is important for  
175 water that is required for leaf transpiration in mangrove plants<sup>35,37,38</sup>, which may, as  
176 articulated below, underlie the decoupling of leaf economics and hydraulics in mangrove  
177 leaves.

178 Under high soil salinity, plant leaves usually suffer greatly from water deficiency in  
179 transpiration due to insufficient water supply from the roots<sup>5,11</sup>. For example, in the mangrove  
180 species *Ceriops tagal*, the vessel diameter of absorptive roots under high salinity is only  
181 two-thirds of that under low salinity. Theoretically, this leads to root water-supply efficiency  
182 under high salinity only 20% as that under low salinity<sup>5</sup>. In coping with such water deficiency,  
183 mangrove plants can increase the amount of water stored in leaf *water storage tissues* for one  
184 hand<sup>35,36,39</sup>, and for the other hand speed up the release of water from the *water storage*  
185 *tissues* for transpiration<sup>37</sup>. Assuming no such water supply from leaf *water storage tissues*,  
186 photosynthetic cells in the palisade would be dehydrated, and photosynthesis would then be  
187 greatly inhibited<sup>36</sup>. Therefore, leaf *water storage tissues* could be closely related to leaf  
188 photosynthesis and leaf economics, given their functioning as an agent to protect  
189 photosynthetic cells from damage caused by dehydration. The physiologically based coupling  
190 of leaf *water storage tissues* with leaf economics also well explains their statistical coupling  
191 (Fig. S1).

192 Here, we used mangroves under high salinity as an example to understand the role of leaf  
193 *water storage tissues* in shaping the decoupling relationship between leaf hydraulics and  
194 economics. Under such salinity stress, mangrove leaf hydraulic traits, such as, *leaf minor vein*  
195 *diameter*, are faced with two competing selection pressures: (1) reducing *leaf minor vein*  
196 *diameter* due to inadequate water supply from thinner root vessels<sup>5,11,40</sup>; and (2) increasing the  
197 size of leaf *water storage tissues*<sup>35</sup> entails a thick *leaf minor vein diameter* to meet the water  
198 requirement of the increased leaf *water storage tissues* (Fig. 4). Therefore, the variation in  
199 *leaf minor vein diameter* with increasing soil salinity may be markedly attenuated by the two  
200 opposing selection pressures, whereas the size of leaf *water storage tissues* tended to increase  
201 in high salinity. The different trajectories of leaf hydraulics (exemplified by *leaf minor vein*  
202 *diameter*) and leaf *water storage tissues* with soil salinity combined with the coupling  
203 between *water storage tissues* and leaf economics may explain the independence between leaf  
204 hydraulics and economics.

205 In mangrove plants, leaf *water storage tissues* usually stores a considerable amount of  
206 water<sup>35,36</sup>. After loss through transpiration, leaf *water storage tissues* can be rehydrated  
207 rapidly through various sources, such as rainfall, dew, fog, and root water supply<sup>38</sup>. Frequent  
208 water loss–rehydration cycling suggests that leaf *water storage tissues* in mangroves  
209 contribute considerably contribution to transpiration. Therefore, the quantity of water  
210 associated with leaf economics (i.e., *WUPM* + water storage in leaf *water storage tissues*)  
211 may be comparable, rather than negligible, to the amount of water used for transpiration (Fig.  
212 4), and leaf economics and hydraulics in mangrove plants should be coupled according to the  
213 novel mechanism proposed in the Introduction section. Contrary to this expectation, leaf

214 economics and hydraulics were decoupled in mangroves. The decoupling of leaf economics  
215 and hydraulics in mangroves could arise primarily from the effect of the selection pressure of  
216 leaf *water storage tissues*, as a key component of leaf economics, on the leaf hydraulic traits  
217 (e.g., *leaf minor vein diameter*). This also suggests that our proposed novel mechanism that  
218 drives decoupled leaf economics and hydraulics may hold only for land plants that do not  
219 possess leaf *water storage tissues*, as such lacking selection pressure on leaf hydraulic traits.

220

221 **Leaf-root traits coordination differs between mangrove and non-mangrove plants.** In  
222 mangrove plants, root hydraulics had a significant correlation with leaf economics but no  
223 correlation with leaf hydraulics (Fig. 2a, Fig. S2). This is partially consistent with our second  
224 hypothesis for mangrove plants. Generally, under drought or physiological drought caused by  
225 high salinity, plant roots and vessels tend to be thinner<sup>11,21,41,42,43</sup>, whereas leaf *water storage*  
226 *tissues* usually increases<sup>34,35,39</sup>. These contrasting trends will cause a negative relationship  
227 between root diameter (representative of root hydraulics) and leaf *water storage tissues*  
228 (representative of leaf economics) in mangrove plants, which was confirmed by our results  
229 (Fig. 2a, Table S5). Given that leaf hydraulics, as argued previously, is decoupled from leaf  
230 *water storage tissues*, it is reasonable to observe a decoupling relationship between root  
231 hydraulics and leaf hydraulics in mangroves (Fig. 2a, Fig. S2b).

232 In contrast to mangrove plants, root hydraulics in non-mangrove plants is well-coordinated  
233 with leaf hydraulics and decoupled from leaf economics (Fig. 2b, Fig. S3). The significant  
234 relationship between root and leaf hydraulics may be because they belong to a common and  
235 continuous vessel system across above- and belowground plant parts. Owing to the decoupled

236 relationship between leaf hydraulics and economics<sup>6,7</sup>, it can be deduced that root hydraulics  
237 is decoupled from leaf economics in non-mangrove plants. Such expected root-leaf  
238 relationships have also been confirmed in recent studies, for example, significant relationships  
239 between root hydraulics (represented by *root diameter*) and *leaf minor vein density*<sup>18</sup> and leaf  
240 transpiration<sup>28</sup>, but no relationship with leaf economics<sup>19</sup>. Obviously, non-mangrove and  
241 mangrove plants diverge greatly with regard to in the root-leaf relationships. Such divergence  
242 may be attributed to the widespread presence of leaf *water storage tissues* in mangrove plants,  
243 which is absent in most non-mangrove plants.

244

245 **Above-belowground trait coordination explained by leaf-root allometric relationship.**

246 Allometry between the *root tissues outside the stele* and the stele in mangrove plant roots,  
247 similar to that in non-mangrove plant roots, was revealed for the first time in this study (Fig.  
248 S6a, b). Allometry in mangrove roots, as is the case in non-mangrove plants, could be formed  
249 to achieve a balance between nutrient absorption and transport as well as a balance between C  
250 supply and consumption<sup>32,44</sup>. In addition to allometry within roots, we found a conspicuous  
251 allometry between roots and leaves in mangrove plants. The *thickness of root tissues outside*  
252 *the stele* increased faster than the stele radius with decreasing *leaf dry mass per area* (Fig. 3a).  
253 In contrast, no such allometry was observed in non-mangrove plants (Fig. 3b).

254 The contrasting leaf-root allometry between mangrove and non-mangrove plants could be  
255 related to the difference in C cycling within plants. Specifically, the well-recognized  
256 decoupling between leaf economics and hydraulics can also convey an independence between  
257 C production and transportation because leaf veins function as C transportation via sieves

258 besides water transportation via vessels, and the sieves and vessels are closely related in  
259 structure and functioning in land plants<sup>32,45</sup>. Physiologically, such decoupling between C  
260 production and transportation can be explained by different environmental factors driving  
261 these processes. For example, leaf C production depends greatly on light, whereas C  
262 transportation is governed by water and phosphorus availability<sup>1</sup>; these environmental factors  
263 always vary independently<sup>5,7,46</sup>.

264 Similar to leaf veins, the *root tissues outside the stele* and the stele in absorptive roots,  
265 although previously treated as hydraulic traits, also serve as key agents for C supply (through  
266 sieves in the stele) and C consumption (through *root tissues outside the stele* cells),  
267 respectively. The allometry between the *root tissues outside the stele* and the stele is thought  
268 to arise from a balance between C supply and consumption within the roots<sup>32</sup>. Since C supply  
269 in roots and C transportation in leaf veins share a common and continuous sieve system, the C  
270 supply and consumption in roots should be related to C transportation in leaves but not to *leaf*  
271 *dry mass per area*, a key leaf economics trait reflecting C production. This could explain our  
272 finding of no allometry of C production (i.e., *leaf dry mass per area*) with C supply (i.e., stele)  
273 and C consumption (i.e., *thickness of root tissues outside the stele*) in non-mangrove plants  
274 (Fig.3b).

275 Surprisingly, we found no correlation between C supply in the root stele and C  
276 transportation in leaf veins in mangrove plants, although roots and leaves share a continuous  
277 sieve system, while we did find a correlation between C supply in roots and C production  
278 leaves (Fig. 3a). These unexpected results can also be attributed to the presence of leaf *water*  
279 *storage tissues* that affect vein vessels and sieves in mangrove leaves differently. As

280 mentioned previously, vein vessels in mangroves suffer from two opposing selection  
281 pressures with increasing salinity: positive pressure due to increased leaf *water storage tissues*  
282 and negative pressure due to increased physiological drought. In contrast to vessels, sieves in  
283 mangrove leaf veins do not seem to be markedly affected by leaf *water storage tissues*  
284 because of the storage of water rather than C (Fig. 4), and the sieves tended to be thin under  
285 increasing salinity stress to match the reduction in photosynthesis and C production<sup>32,47</sup>.  
286 Therefore, in contrast to non-mangrove plants (Fig. 3b), C production (represented by *leaf dry*  
287 *mass per area*) in mangrove leaves should be coupled with vein sieve-based C transportation,  
288 and consequently linked with root C supply (through sieves in the stele) and C consumption  
289 (through cells of *root tissues outside the stele thickness*) in an allometric manner (Fig. 3a).  
290 Root-leaf allometry paves a new way to understand the above- and belowground interactions  
291 regarding key components of C cycling within mangrove plants; that is, C production and  
292 transportation in leaves and C supply and consumption in roots.

293 In conclusion, our results revealed, for the first time, decoupled relationships between leaf  
294 hydraulics and economics and between root and leaf hydraulics, as well as allometry between  
295 *root tissues outside the stele* and the stele with a shift in *leaf dry mass per area*. In contrast,  
296 non-mangrove plants had leaf hydraulics coupled with root hydraulics while decoupled from  
297 leaf economics, and they also lacked leaf-root allometry. The contrasting leaf-leaf and  
298 leaf-root relationships could be due to the presence of leaf *water storage tissues* in mangroves  
299 that is absent from non-mangroves. Our study highlights the profound effects of leaf *water*  
300 *storage tissues* in shaping whole-plant strategies of resource (water and C) absorption,  
301 transportation, and consumption, potentially through its different impacts on vein vessels and

302 sieves (Fig. 4). Give the widespread of leaf *water storage tissues* in mangroves, the novel  
303 leaf-root coordination in mangroves relative to non-mangroves potentially represents a new  
304 paradigm with which we look into the ecology, physiology and evolution of the important  
305 vegetation on Earth. In this sense, these findings are much insightful for understanding and  
306 prediction the dynamics and responses of mangrove ecosystems to environmental change.  
307 Last but not the least, our findings suggest that future studies on genetic improvement of  
308 mangrove plants should be oriented to identify key genetic factors or pathways governing  
309 interspecific variation of leaf *water storage tissues*.

310

## 311 **Materials and methods**

312 **Sampling site and sample collection.** This study was conducted in the Dongzhai Harbor  
313 National Natural Reserve (19°51'–20°01'N, 110°30'–110°37'E) in northeast Haikou City,  
314 Hainan province, China, where the mangrove ecosystem is located. It is the first and the  
315 largest mangrove reserve in China, with the most representative and pristine natural mangrove  
316 distribution. The area has a tropical monsoon climate. The mean annual temperature is  
317 23.5 °C, with the highest mean monthly temperature, 28.4 °C, in July and the lowest, 17.1 °C,  
318 in January. The annual precipitation is 1,676 mm, and more than 80% is concentrated between  
319 May and October.

320 We collected the absorptive roots and leaves of 17 mangrove species typical at this reserve  
321 site in May 2015 (see Table S7 for details). Five mature trees were selected from each species.  
322 We selected 15–20 mature and intact canopy leaves and 3–5 intact root branches, including  
323 the first 3 terminal root orders for each individual. All root branches and a portion of leaves

324 were immediately placed in FAA fixation solution (90 mL 70% alcohol, 5 mL 100% acetic  
325 acid, and 5 mL 37% methanol) for root and leaf anatomy measurements. Separate subsamples  
326 of the leaves were placed in NaOH solution to determine leaf vein diameter and density. The  
327 remaining leaf samples were used to measure for measurements of leaf morphology and  
328 chemicals.

329

330 **Trait measurements.** We first determined *leaf thickness* for each species. The leaves were  
331 then scanned before the individual leaf area was calculated using IMAGE J software (NIH  
332 Image, Bethesda, MD, USA). The leaves were oven-dried at 60 °C for 48 h and were then  
333 weighed to determine *specific leaf area* (leaf area per unit leaf dry mass, SLA), *leaf dry mass*  
334 *per area* (LMA), and *leaf tissue density* (LTD). *Leaf mass-based nitrogen concentration* and  
335 *leaf C isotope composition* were measured using an elemental analyzer interfaced with isotope  
336 ratio mass spectrometry (EA1112 coupled with Delta-XP, Thermo Fisher Scientific, Bremen,  
337 Germany). The above leaf morphological and chemical traits are usually considered leaf  
338 economics traits (closely related to leaf photosynthesis). Leaf *total phenol content*, an  
339 indicator of leaf defense function, usually shows a trade-off with leaf photosynthesis<sup>48</sup>.  
340 Therefore, we considered *total phenol content* as a leaf economics trait, and which was  
341 measured by referring to the method in a classical study<sup>49</sup>.

342 Because mangrove leaves are usually thick and cuticle-rich for resistance to alkali decay,  
343 we first removed the epidermis and upper layers of the mesophyll to expose the leaf minor  
344 veins using a sharp knife or needle. The leaves were then dipped into a 5%–7% NaOH  
345 solution for hours to expose the leaf minor veins. The leaf veins were stained red and



346 photographed using a camera (Eclipse Ni-U; Nikon). For each species, at least six fields of  
347 view per leaf were selected to calculate *leaf minor vein diameter* ( $LV_{\text{dia}}$ ,  $\mu\text{m}$ ) and *density*  
348 ( $LV_{\text{den}}$ ,  $\text{mm mm}^{-2}$ ) using IMAGE J (NIH Image, Bethesda, MD, USA)<sup>7</sup>.

349 Leaf and root anatomical structures were determined using a common method for paraffin  
350 sectioning. Briefly, several leaves and the first-order roots were taken from the FAA solutions  
351 and were then processed in a suite of procedures, including dehydration, embedding in paraffin,  
352 cutting into sections (8  $\mu\text{m}$  thickness), staining and then photographing<sup>5,26</sup>. First-order root  
353 and leaf anatomical structures were determined using IMAGE J software (NIH Image,  
354 Bethesda, MD, USA). Specifically, we measured *root diameter*, *root stele diameter*, and  
355 *thickness of root tissues outside the stele* (including epidermis, exodermis and cortex), as  
356 these traits are closely related to water and nutrient absorption and transportation<sup>18,27</sup>. The  
357 *stele to root diameter ratio*, a key trait for root hydraulics, was also calculated<sup>26</sup>. Leaf *water*  
358 *storage tissues* have been widely observed in the hypodermis, sponge tissue and trichome  
359 layer in mangroves<sup>14,15</sup>. Here, we defined the size of leaf *water storage tissues* as the  
360 proportion of leaf cross-sectional area by the sum of the cross-sectional areas of the  
361 hypodermis, sponge tissue and trichome layer. In this study, leaf *water storage tissues* was an  
362 important trait, seemingly linked with both leaf economics and leaf hydraulics. To determine  
363 which trait spectra leaf *water storage tissues* belongs to, we first examined the correlations of  
364 leaf *water storage tissues* with leaf economics and leaf hydraulic traits separately. Then, the  
365 results of leaf *water storage tissues*-based pairwise correlations were further validated using a  
366 trait permutation analysis developed in a previous study<sup>7</sup> (see Data analyses section for  
367 details).

368 To compare mangrove and non-mangrove species, we compiled a dataset from previous  
369 studies accessible for leaf hydraulic, economics, and root hydraulic traits. As most of the  
370 mangrove species in our study were woody, we selected only published studies on woody  
371 species<sup>7,26</sup>, and 78 species were included. We acknowledge that the leaf traits used in the  
372 comparing mangrove and non-mangrove plants were not the same. For example, we only had  
373 leaf vein traits and lacked leaf stomatal traits in mangrove plants. Nevertheless, incomplete  
374 mangrove leaf hydraulic traits could hardly markedly affect the relationships between leaf  
375 hydraulics and leaf economics and root hydraulics because of the universal coupling between  
376 leaf vein and stomatal traits<sup>50,51,52,53,54</sup>.

377 Additionally, only four leaf economics traits were only included in the mangrove plants:  
378 *specific leaf area*, *leaf water storage tissues*, *leaf tissue density* and *total phenol content*.  
379 Inclusion of *specific leaf area* should have little effect on the trait relationships for mangrove  
380 plants because *specific leaf area* is only a mathematical reciprocal of *leaf dry mass per area*.  
381 Even after removing the three traits included only in the current mangrove study, that is, leaf  
382 *water storage tissues*, *leaf tissue density*, and *total phenol content*, the trait relationships  
383 within leaves and between leaves and roots were almost the same (see Fig. S8 and S9 in the  
384 Supporting Information). Therefore, it is feasible to compare mangrove and non-mangrove  
385 plants.

386

387 **Phylogenetic tree construction.** Phylogenetic trees for the mangrove plants of this study and  
388 non-mangrove plants from previous studies<sup>7,26</sup> (Fig. S10, S11) were constructed separately  
389 using the R package V. PhyloMaker<sup>55,56</sup>. Plant names in the phylogenetic tree were referenced

390 against The Plant List (<http://www.theplantlist.org/>).

391

392 **Data analyses.** We calculated the mean, minimum, maximum, standard error and coefficient  
393 of variation (CV) of each root and leaf trait. We calculated the phylogenetic signal by  
394 employing Blomberg's  $K$  test, assuming a Brownian evolution model. A higher  $K$  value for a  
395 trait indicates more phylogenetic conservatism (i.e., more influence of the trait by a common  
396 ancestor than by environments)<sup>57</sup>. All the original data of non-mangrove plants and partial  
397 data of mangrove plants that did not confirm to a normal distribution, such as *root diameter*,  
398 *root stele diameter*, *thickness of root tissues outside the stele*, *leaf minor vein diameter* and  
399 *density*, *specific leaf area*, and *leaf mass-based nitrogen concentration*, were log-transformed.  
400 Pairwise trait relationships were assessed using Pearson's correlation. We also explored trait  
401 relationships using phylogenetically independent contrasts (PICs), which exclude the  
402 influence of a common ancestor on trait relationships.

403 To explore the relationships between leaf hydraulics and economics in leaves, and the  
404 relationships between root hydraulics and leaf hydraulics and economics, we used a  
405 multivariate ordination method developed in a previous study<sup>7</sup>. All the data were standardized,  
406 and three separate PCAs were conducted using three different trait groups (i.e., leaf  
407 economics, leaf hydraulics, and root hydraulics) (Fig. 2a, b). Subsequently, we created a  
408 sampling distribution using the scores of 10,000 permutations of the first principal component  
409 axis (PC1) of each PCA. Finally, the relationships among leaf economics, leaf hydraulic and  
410 root hydraulic traits were assessed based on the permutation results<sup>27</sup>.

411 To test whether there was an allometric relationship between *root tissues outside the stele*

412 and the stele in mangrove species, we compared the slopes of the regressions of *thickness of*  
413 *root tissues outside the stele* and stele radius with increasing root diameter using the  
414 standardized major axis method. Furthermore, if allometry between *root tissues outside the*  
415 *stele* and stele existed, we also explored whether within-root allometry could be applied to  
416 root-leaf allometry. Specifically, we first explored whether there were correlations between  
417 *leaf dry mass per area*, a key leaf economics trait, with *thickness of root tissues outside the*  
418 *stele* and stele radius. Where present, the slopes of the regressions of *thickness of root tissues*  
419 *outside the stele* and stele radius with *leaf dry mass per area*, were compared using the R  
420 package ‘smatr’. All data analyses were performed using R software (v. 3.30, R Core Team,  
421 2016).  
422

423 **Data availability**

424 Data of mangrove species are available in Dryad Digital Repository, a publicly available  
425 database, or acquirable on request of the corresponding author. Data of root and leaf traits for  
426 non-mangrove species can be assessed in the supporting information of two previous  
427 studies<sup>7,26</sup>.

428 **References**

- 429 1. Taiz, L. & Zeiger, E. *Plant Physiology (Fifth Edition): Unit 2 Biochemistry and*  
430 *Metabolism* (Sinauer Associates, Sunderland, 2015).
- 431 2. Wright, I. J., Reich, P. B., Westoby, M., Ackerly, D. D. B., Z. , Bongers, F. C.-B., J.  
432 Chapin, T. The worldwide leaf economics spectrum. *Nature* **428**, 821-827 (2004).
- 433 3. Reich, P. B. The world-wide ‘fast-slow’ plant economics spectrum: a traits manifesto.  
434 *J. Ecol.* **102**, 275-301 (2014).
- 435 4. Diaz, S., *et al.* The global spectrum of plant form and function. *Nature* **529**, 167-171  
436 (2016).
- 437 5. Cao, J., *et al.* Leaf hydraulics coordinated with leaf economics and leaf size in  
438 mangrove species along a salinity gradient. *Plant Divers*, (2022).
- 439 6. Sack, L., *et al.* How do leaf veins influence the worldwide leaf economic spectrum?  
440 Review and synthesis. *J Exp Bot* **64**, 4053-4080 (2013).
- 441 7. Li, L., *et al.* Leaf economics and hydraulic traits are decoupled in five species-rich  
442 tropical-subtropical forests. *Ecol Lett* **18**, 899-906 (2015).
- 443 8. Zhang, S. B., *et al.* Evolutionary association of stomatal traits with leaf vein density in  
444 *Paphiopedilum*, Orchidaceae. *PLoS One* **7**, e40080 (2012).
- 445 9. Zhang, J. & Cao, K. Stem hydraulics mediates leaf water status, carbon gain, nutrient  
446 use efficiencies and plant growth rates across dipterocarp species. *Funct Ecol* **23**,  
447 658-667 (2009).
- 448 10. Hogan, J. A., Valverde-Barrantes, O. J., Ding, Q., Xu, H., Baraloto, C. Morphological  
449 variation of fine root systems and leaves in primary and secondary tropical forests of

- 450 Hainan Island, China. *Ann. For. Sci.* **77**, 79 (2020).
- 451 11. Jiang, G. F., Li, S. Y., Li, Y. C., Roddy, A. B. Coordination of hydraulic thresholds  
452 across roots, stems, and leaves of two co-occurring mangrove species. *Plant Physiol*,  
453 **00**, 1–16 (2022).
- 454 12. Naskar, S. & Palit, P. K. Anatomical and physiological adaptations of mangroves. *Wetl*  
455 *Ecol Manag* **23**, 357-370 (2015).
- 456 13. Rashid, P., Shethi, K. J., Ahmed, A. Leaf anatomical adaptation of eighteen mangrove  
457 plant species from the Sundarbans in Bangladesh. *BANGL J BOT* **49**, 903-911  
458 (2020).
- 459 14. Huang, G. & Huang, Q. The leaf vegetative structures and its ecological adaptation in  
460 Chinese mangrove plants (I). *Ecolo Scien* **8**, 102-107 (1989).
- 461 15. Chapman, V. J. *Mangrove vegetation*, 301-338 (1976).
- 462 16. Tian, S., Zhu, S., Zhu, J., Shen, Z., Cao, K. Impact of leaf morphological and  
463 anatomical traits on mesophyll conductance and leaf hydraulic conductance in  
464 mangrove plants. *Plant Scie J* **34**, 909-919 (2016).
- 465 17. Valverde-Barrantes, O. J., Freschet, G. T., Roumet, C., Blackwood, C. B. A worldview  
466 of root traits: the influence of ancestry, growth form, climate and mycorrhizal  
467 association on the functional trait variation of fine-root tissues in seed plants. *New*  
468 *Phytol* **215**, 1562-1573 (2017).
- 469 18. Valverde-Barrantes, O. J., Maherali, H., Baraloto, C., Blackwood, C. B. Independent  
470 evolutionary changes in fine-root traits among main clades during the diversification  
471 of seed plants. *New Phytol* **228**, 541-553 (2020).

- 472 19. Weigelt, A., *et al.* An integrated framework of plant form and function: the  
473 belowground perspective. *New Phytol* **232**, 42-59 (2021).
- 474 20. Carmona, C. P., *et al.* Fine-root traits in the global spectrum of plant form and function.  
475 *Nature* **597**, 683-687 (2021).
- 476 21. Weemstra, M., Kuyper, T. W., Sterck, F. J., Umaña, M. N. Incorporating belowground  
477 traits: avenues towards a whole-tree perspective on performance. *Oikos*, (2022).
- 478 22. Woodroffe, C. *Tropical Mangrove Ecosystems: Mangrove Sediments and*  
479 *Geomorphology Ch. 2* (American Geophysical Union, Columbia, 1992).
- 480 23. Long, Y., Kong, D., Chen, Z., Zeng, H. Variation of the linkage of root function with  
481 root branch order. *PLoS One* **8**, e57153 (2013).
- 482 24. Liang, X., *et al.* Metabolomics-driven gene mining and genetic improvement of  
483 tolerance to salt-induced osmotic stress in maize. *New Phytol* **230**, 2355-2370 (2021).
- 484 25. Fernie, A. R. Associating primary and specialized metabolism with salt induced  
485 osmotic stress tolerance in maize. *New Phytol* **230**, 2355-2370 (2021).
- 486 26. Kong, D., *et al.* Leading dimensions in absorptive root trait variation across 96  
487 subtropical forest species. *New Phytol* **203**, 863-872 (2014).
- 488 27. Freschet, G. T., *et al.* Root traits as drivers of plant and ecosystem functioning: current  
489 understanding, pitfalls and future research needs. *New Phytol* **232**, (2021).
- 490 28. Zhou, M., Bai, W., Li, Q., Guo, Y., Zhang, W. H. Root anatomical traits determined  
491 leaf-level physiology and responses to precipitation change of herbaceous species in a  
492 temperate steppe. *New Phytol* **229**, 1481-1491 (2021).
- 493 29. Zhou, M., *et al.* Using anatomical traits to understand root functions across root orders



- 494 of herbaceous species in a temperate steppe. *New Phytol* **234**, 422-434 (2022).
- 495 30. Kong, D., *et al.* Nonlinearity of root trait relationships and the root economics  
496 spectrum. *Nat Commun* **10**, 2203 (2019).
- 497 31. Kong, D., Fridley, J. D., Cooke, J. Does plant biomass partitioning reflect energetic  
498 investments in carbon and nutrient foraging? *Funct Ecol* **33**, 1627-1637 (2019).
- 499 32. Kong, D., Wang, J., Valverde-Barrantes, O. J., Kardol, P. A framework to assess the  
500 carbon supply–consumption balance in plant roots. *New Phytol* **229**, (2021).
- 501 33. Colombi, T., Chakrawal, A., Herrmann, A. M. Carbon supply-consumption balance in  
502 plant roots: effects of carbon use efficiency and root anatomical plasticity. *New Phytol*  
503 **233**, 1542-1547 (2021).
- 504 34. Rashid, P., Shethi, K. J., Ahmed, A. Leaf anatomical adaptation of eighteen mangrove  
505 plan species from the sundarbans in bangladesh. *Bangladesh J Bot* **49**, 903-911  
506 (2020).
- 507 35. Nguyen, H. T., *et al.* Leaf water storage increases with salinity and aridity in the  
508 mangrove *Avicennia marina*: integration of leaf structure, osmotic adjustment and  
509 access to multiple water sources. *Plant Cell Environ* **40**, 1576-1591 (2017).
- 510 36. Nguyen, H. T., Meir, P., Wolfe, J., Mencuccini, M., Ball, M. C. Plumbing the depths:  
511 extracellular water storage in specialized leaf structures and its functional expression  
512 in a three-domain pressure -volume relationship. *Plant Cell Environ* **40**, 1021-1038  
513 (2016).
- 514 37. Zweifel, R., Item, H., Hasler, R. Link between diurnal stem radius changes and tree  
515 water relations. *Tree Physiol* **21**, 869-877 (2001).

- 516 38. Lechthaler, S., *et al.* Rhizophoraceae Mangrove Saplings Use Hypocotyl and Leaf  
517 Water Storage Capacity to Cope with Soil Water Salinity Changes. *Front Plant Sci* **7**,  
518 895 (2016).
- 519 39. Borkar, M. U., Athalye, R. P., Goldin, Q. Salinity induced changes in the leaf anatomy  
520 of the mangrove *Avicennia marina* along the anthropogenically stressed tropical creek.  
521 *J Coast Res* **14**, 191-201 (2011).
- 522 40. Robert, E. M. R., Koedam, N., Beeckman, H., Schmitz, N. A safe hydraulic  
523 architecture as wood anatomical explanation for the difference in distribution of the  
524 mangroves *Avicennia* and *Rhizophora*. *Funct Ecol* **23**, 649-657 (2009).
- 525 41. Tatongjai, S., Kraichak, E., Kermanee, P. Comparative anatomy and salt management  
526 of *Sonneratia caseolaris* (L.) Engl. (Lythraceae) grown in saltwater and freshwater.  
527 *PeerJ* **9**, e10962 (2021).
- 528 42. Basyuni, M., *et al.* Growth and root development of four mangrove seedlings under  
529 varying salinity. *IOP Conf Series: EES*, **130**, (2018).
- 530 43. Chen, W., Zeng, H., Eissenstat, D. M., Guo, D. Variation of first-order root traits  
531 across climatic gradients and evolutionary trends in geological time. *Glob. Ecol.*  
532 *Biogeogr* **22**, 846-856 (2013).
- 533 44. Kong, D., *et al.* The nutrient absorption-transportation hypothesis- optimizing  
534 structural traits in absorptive roots. *New Phytol* **213**, (2016).
- 535 45. Jacobsen, A. L., *et al.* Intra-organismal variation in the structure of plant vascular  
536 transport tissues in poplar trees. *Trees* **32**, 1335-1346 (2018).
- 537 46. Chapin III, F. S. M., P. A., Vitousek, P. M. *Principles of Terrestrial Ecosystem Ecology* :

- 538            *Water and Energy Balance* (Springer Science+Business Media, Iowa, 2011).
- 539    47.    Nandy, P., Ghose, M. Photosynthesis and water-use efficiency of some mangroves  
540            from Sundarbans, India. *J. Plant Biol.* **44**, 213-219 (2001).
- 541    48.    Eallonardo Jr, A. S., Leopold, D. J., Fridley, J. D., Stella, J. C. Salinity tolerance and  
542            the decoupling of resource axis plant traits. *J. Veg. Sci* **24**, 365-374 (2013).
- 543    49.    Hättenschwiler, S., Jørgensen, H. B. Carbon quality rather than stoichiometry controls  
544            litter decomposition in a tropical rain forest. *J. Ecol.* **98**, 754-763 (2010).
- 545    50.    Wang, S., Wang, W., Wang, S., Yang, L., Gu, J. Intraspecific variations of anatomical,  
546            morphological and chemical traits in leaves and absorptive roots along climate and  
547            soil gradients: a case study with *Ginkgo biloba* and *Eucommia ulmoides*. *Plant Soil*  
548            **469**, 73-88 (2021).
- 549    51.    Pan, L., *et al.* Coordination of stomata and vein patterns with leaf width underpins  
550            water-use efficiency in a C4 crop. *Plant Cell Environ* **45**, 1612-1630 (2022).
- 551    52.    Carins Murphy, M. R., Jordan, G. J., Brodribb, T. J. Acclimation to humidity modifies  
552            the link between leaf size and the density of veins and stomata. *Plant Cell Environ* **37**,  
553            124-131 (2014).
- 554    53.    Cardoso, A. A., Randall, J. M., Jordan, G. J., McAdam, S. A. M. Extended  
555            differentiation of veins and stomata is essential for the expansion of large leaves in  
556            *Rheum rhabarbarum*. *Am J Bot* **105**, 1967-1974 (2018).
- 557    54.    Li, F., McCulloh, K. A., Sun, S., Bao, W. Linking leaf hydraulic properties,  
558            photosynthetic rates, and leaf lifespan in xerophytic species: a test of global  
559            hypotheses. *Am J Bot* **105**, 1858-1868 (2018).

560 55. Jin, Y., Qian, H. V. PhyloMaker: an R package that can generate very large phylogenies  
561 for vascular plants. *Ecography* **42**, 1353-1359 (2019).

562 56. Jin, Y., Qian, H. V. PhyloMaker2: An updated and enlarged R package that can  
563 generate very large phylogenies for vascular plants. *Plant Divers*, (2022).

564 57. Blomberg, S. P., Garland, T., Ives, R. Testing for Phylogenetic Signal in Comparative  
565 Data: Behavioral Traits Are More Labile. *Evolution* **57**, (2003).

566

567

568

569 **Acknowledgements**

570 We thank Mr. Lingqun Kong and Jianhai Chen for assistance in plant materials collection;  
571 Haiyan Zhang, Chao Guan, Xinyu Lu, Jinqi Tang, Qubing Ran, Song Huang and Mengke  
572 Wang for their help of trait measurements in the lab and phylogenetic analysis; and Editage  
573 ([www.editage.cn](http://www.editage.cn)) for proofreading manuscript. We are grateful to Dongzhai Harbor mangrove  
574 Wetland National Nature Reserve for their support. This study was funded by the National  
575 Natural Science Foundation of China (32171746, 31870522 and 31670550), and the Scientific  
576 Research Foundation of Henan Agricultural University (30500854), Research Funds for  
577 overseas returnee in Henan Province, China.

578

579 **Author contribution**

580 D.K. and J.C. conceived the idea and collected the data. J.C., D.K. and W.R. conducted the  
581 statistical analyses. J.C., M.L. and D.K. wrote the draft of the manuscript. All authors  
582 contributed to the discussion of the results, manuscript revision and completion.

583

584 **Competing interests**

585 The authors declare no competing interests that could influence the work reported in this  
586 paper.

587

588 **Table 1** Variation in 14 root and leaf functional traits measured from 17 mangrove species.

|      | Functional traits                                  | Unit                            | Mean   | SE*    | CV†   | Max    | Min    | Blomberg's K |
|------|----------------------------------------------------|---------------------------------|--------|--------|-------|--------|--------|--------------|
| Leaf | <i>Leaf thickness</i>                              | mm                              | 0.42   | 0.036  | 34.93 | 0.65   | 0.13   | 0.17         |
|      | <i>Leaf dry mass per area</i>                      | g cm <sup>-2</sup>              | 0.01   | 0.001  | 39.31 | 0.02   | 0.00   | 0.12         |
|      | <i>Leaf mass-based nitrogen concentration</i>      | mg g <sup>-1</sup>              | 2.01   | 0.181  | 37.13 | 3.95   | 1.09   | 0.10         |
|      | <i>Leaf carbon isotope composition</i>             | ‰                               | -30.58 | 0.397  | -5.35 | -27.01 | -32.93 | 0.08         |
|      | <i>Specific leaf area</i>                          | cm <sup>2</sup> g <sup>-1</sup> | 92.94  | 13.424 | 59.55 | 245.60 | 40.41  | 0.17         |
|      | <i>Leaf tissue density</i>                         | g cm <sup>-3</sup>              | 0.32   | 0.013  | 17.07 | 0.39   | 0.20   | 0.08         |
|      | <i>Total phenol content</i>                        | %                               | 2.34   | 0.258  | 45.42 | 4.37   | 0.60   | 0.08         |
|      | <i>Water storage tissues</i>                       | %                               | 0.13   | 0.014  | 43.39 | 0.24   | 0.06   | 0.08         |
|      | <i>Leaf minor vein diameter</i>                    | µm                              | 49.13  | 8.922  | 74.88 | 156.64 | 15.50  | 0.08         |
|      | <i>Leaf minor vein density</i>                     | mm mm <sup>-2</sup>             | 10.66  | 2.383  | 92.13 | 42.85  | 2.30   | 0.10         |
| Root | <i>Root diameter</i>                               | µm                              | 191.01 | 18.300 | 39.50 | 388.03 | 112.24 | 0.26         |
|      | <i>Thickness of root tissues outside the stele</i> | µm                              | 78.19  | 7.826  | 41.26 | 163.32 | 44.11  | <b>0.26</b>  |
|      | <i>Root stele diameter</i>                         | µm                              | 34.28  | 3.232  | 38.88 | 61.42  | 20.19  | 0.17         |
|      | <i>Stele to root diameter ratio</i>                | %                               | 0.19   | 0.009  | 20.20 | 0.24   | 0.12   | 0.08         |

589 Root traits were measured for the first-order roots.

590 SE\*, standard error.

591 CV†, coefficient of variance.

592 Blomberg's K values in bold indicate they are significant at  $p < 0.05$ .

593 **Table 2** Variation in 12 root and leaf functional traits measured from 78 non-mangrove plant species.

|      | Functional traits                                  | Unit                                 | Mean   | SE*   | CV†   | Max     | Min    | Blomberg's K |
|------|----------------------------------------------------|--------------------------------------|--------|-------|-------|---------|--------|--------------|
| Leaf | <i>Leaf thickness</i>                              | mm                                   | 0.24   | 0.01  | 32.65 | 0.56    | 0.09   | 0.01         |
|      | <i>Leaf dry mass per area</i>                      | g m <sup>-2</sup>                    | 79.53  | 2.89  | 32.72 | 159.17  | 32.53  | 0.01         |
|      | <i>Leaf mass-based nitrogen concentration</i>      | mg g <sup>-1</sup>                   | 17.70  | 0.69  | 35.30 | 36.28   | 5.40   | 0.01         |
|      | <i>Leaf carbon isotope composition</i>             | ‰                                    | -31.93 | 0.21  | -5.93 | -27.38  | -36.72 | <b>0.22</b>  |
|      | <i>Leaf minor vein density</i>                     | mm mm <sup>-2</sup>                  | 6.12   | 0.22  | 32.22 | 13.01   | 2.28   | 0.01         |
|      | <i>Stomatal guard cell length</i>                  | µm                                   | 20.97  | 0.57  | 24.61 | 35.40   | 9.56   | <b>0.35</b>  |
|      | <i>Stomatal density</i>                            | mm <sup>-2</sup>                     | 398.79 | 29.85 | 67.37 | 1716.07 | 91.47  | 0.04         |
|      | <i>Maximum stomatal conductance to water vapor</i> | mol mm <sup>-2</sup> s <sup>-1</sup> | 1.45   | 0.08  | 47.40 | 4.83    | 0.37   | 0.02         |
| Root | <i>Root diameter</i>                               | µm                                   | 362.98 | 22.82 | 56.58 | 1010.00 | 73.00  | <b>0.42</b>  |
|      | <i>Thickness of root tissues outside the stele</i> | µm                                   | 232.36 | 17.27 | 66.89 | 675.00  | 26.00  | <b>0.22</b>  |
|      | <i>Root stele diameter</i>                         | µm                                   | 83.28  | 4.74  | 51.25 | 258.00  | 24.00  | 0.07         |
|      | <i>Stele to root diameter ratio</i>                | %                                    | 0.25   | 0.01  | 20.96 | 0.39    | 0.16   | 0.02         |

594 Root traits were measured for the first-order roots.

595 SE\*, standard error.

596 CV†, coefficient of variance.

597 Blomberg's K values in bold indicate they are significant at  $p < 0.05$ .

**Figure 1 Traits decoupling of leaf economics and hydraulics shared among mangrove and non-mangrove plants.**

(a) In mangrove trees, leaf economics traits (denoted in blue; e.g., LMA, SLA) do not align with leaf hydraulics traits (denoted in green; e.g.,  $LV_{dia}$ ) according to a principal component analysis of 17 species, suggesting the decoupling of the leaf economics and hydraulics. (b) In non-mangrove plants, we observe a similar pattern of traits decoupling between leaf economics and leaf hydraulics, suggested by the largely orthogonal alignment between the two groups of traits (blue vs. green). Traits abbreviation: LTh, leaf thickness; LMA, leaf dry mass per area;  $N_{mass}$ , leaf mass-based nitrogen concentration;  $\delta^{13}C$ , leaf carbon isotope composition; SLA, specific leaf area; LTD, leaf tissue density; Tphol, total phenol content; WST, water storage tissues;  $LV_{dia}$ , leaf minor vein diameter;  $LV_{den}$ , leaf minor vein density; SL, stomatal guard cell length; SD, stomatal density;  $g_{wmax}$ , maximum stomatal conductance to water vapor.

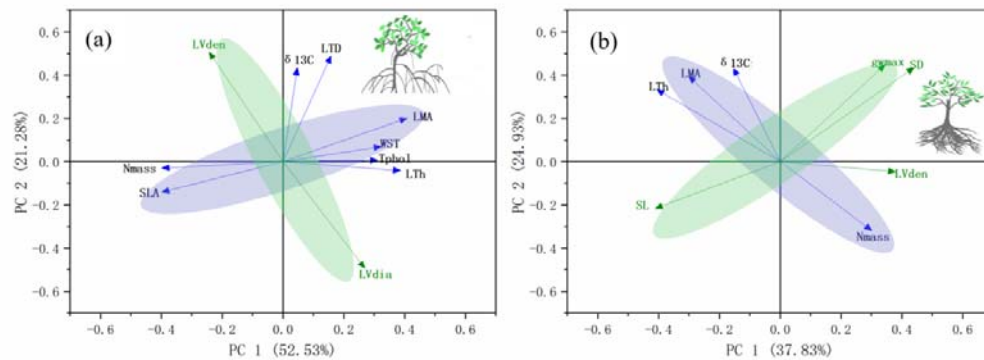



**Figure 2 Leaf-root traits coordination differs between mangrove and**

**non-mangrove plants. (a)** In mangrove trees, the newly added root traits (in red), align with majority of leaf economics traits (denoted in blue consistent with Fig.1; e.g., LMA) and largely orthogonal to leaf hydraulic traits (denoted in green consistent with Fig.1). **(b)** In contrast with mangrove trees, root traits of non-mangrove plants appear to be orthogonal to leaf economics traits. Abbreviations of the traits are: LTh, leaf thickness; LMA, leaf dry mass per area; N<sub>mass</sub>, leaf mass-based nitrogen concentration;  $\delta^{13}\text{C}$ , leaf carbonisotope composition; SLA, specific leaf area; LTD, leaf tissue density; Tphol, total phenol content; WST, water storage tissues; LV<sub>dia</sub>, leaf minor vein diameter; LV<sub>den</sub>, leaf minor vein density; Diam, root diameter; ToS, thickness of root tissues outside the stele; Stele, root stele diameter; Stele : Diam, stele to root diameter ratio; SL, stomatal guard cell length; SD, stomatal density; g<sub>wmax</sub>, maximum stomatal conductance to water vapor.

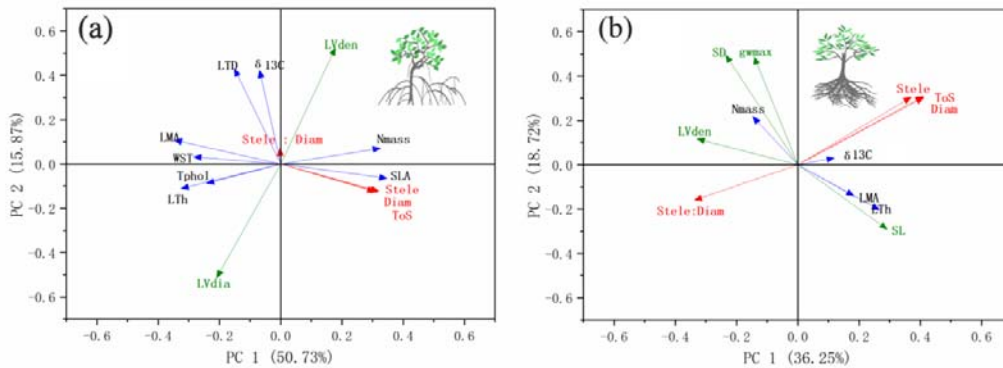

**Figure 3 Allometric relationships between roots and leaves in mangrove (a) and non-mangrove plants (b).** Root anatomic structures refer to root stele radius and thickness of root tissues outside the stele. Abbreviations: ToS, thickness of root tissues outside the stele; Diam, root diameter; LMA, leaf dry mass per area.

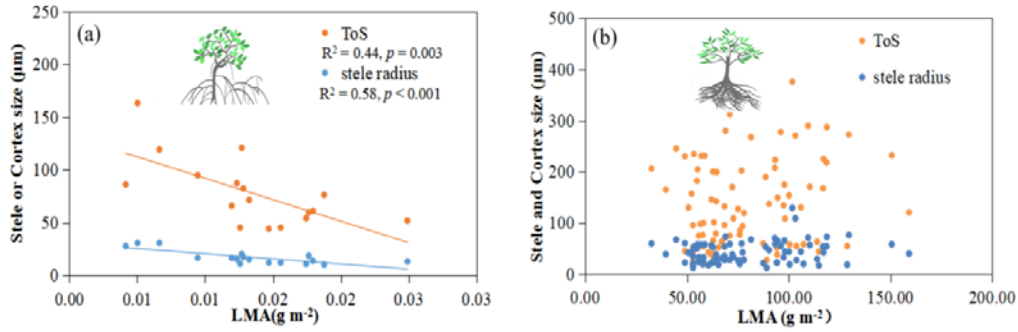

**Figure 4 A conceptual framework of water transport and partition from roots to leaves for mangrove and non-mangrove plants.** The blue dashed lines in leaves represent three ways of water partition from minor veins to (1) water storage tissue in leaves and loss from stomata, (2) palisade tissue for photosynthesis, and (3) transpiration via stomata in mangrove plants; water partition ways in non-mangrove plants usually include the above (2) and (3). The CO<sub>2</sub> fixation and hence the photosynthate are indicated with solid circles and dashed lines in orange. The relative amount of water used in the above partition ways, by referring to studies on mangrove plants<sup>35,36</sup>, was roughly represented by different-sized dashed lines and stripes in blue.

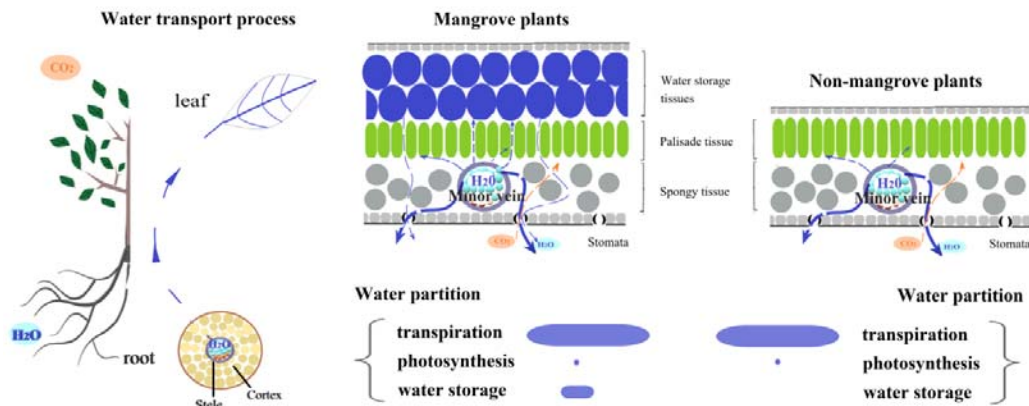

Source: https://www.biorxiv.org/content/10.1101/2022.07.26.501578v1.full.pdf
